# Supplementary material for: Youth Sports, Gender, and Pathways to Political Involvement
Source: Research Square preprint supplement (doi:10.21203/rs.3.rs-8001537/v1), 2025-11-22
Supplement: Supplementary file 1 [file a4f607edd76a180c9b509a7d.docx]

**Appendix**

**Table A.1 Summary of Secondary Datasets, Key Variables, and Bivariate Correlations**

| Dataset | Sample | Age | DV | IV | Girls | Boys |
| --- | --- | --- | --- | --- | --- | --- |
| Flash Eurobarometer 408: European Youth | 13454 | 15-30 | Political Participation | Sports Participation | 0.07675376* p<0.001 | 0.01414186 |
| Eurobarometer 62,4 October-November 2004 | 24603 | 15-97 | Political Participation | Sports Participation | 0.1466394* p= p<0.001 | 0.0364653* p<0.001 |
| Add Health, 1994-2018 | 4856 | Wave 3, 18-26; Wave 4, 24-32 | Attend Rally | Team Sport | 0.01268274 | 0.02634327 |
| Add Health, 1994-2018 | 4856 | Wave 3, 18-26; Wave 4, 24-32 | Party Membership | Team Sport | -0.03618436 | 0.0584342 |
| Add Health, 1994-2018 | 4856 | Wave 3, 18-26; Wave 4, 24-32 | Attend Rally | Individual Sport | 0.09008264* p<0.001 | 0.07756542* p<0.001 |
| Add Health, 1994-2018 | 4856 | Wave 3, 18-26; Wave 4, 24-32 | Party Membership | Individual Sport | 0.03825441 | 0.06542403 |
| Add Health, 1994-2018 | 4856 | Wave 3, 18-26; Wave 4, 24-32 | Vote Local | Team Sport | 0.002609869 | 0.03161064* p<0.05 |
| Add Health, 1994-2018 | 4856 | Wave 3, 18-26; Wave 4, 24-32 | Vote Local | Individual Sport | 0.01565406 | 0.0474196* p<0.05 |
| Add Health, 1994-2018 | 4856 | Wave 3, 18-26; Wave 4, 24-32 | Longitudinal Vote Local | Team Sport | -0.006764504 | 0.03757919* p<0.01 |
| Add Health, 1994-2018 | 4856 | Wave 3, 18-26; Wave 4, 24-32 | Longitudinal Vote Local | Individual Sport | 0.03734111 | 0.04076017* p<0.01 |
| ISSP 2007, Leisure time and sports | 27599 | 15-97 | Political Participation | Sport Group | 0.1784386* p= p<0.001 | 0.1608485* p p<0.001 |
| ISSP 2007, Leisure time and sports | 27599 | 15-97 | Political Participation | Civic Group | 0.3307803* p= p<0.001 | 0.35565* p<0.001 |
| ISSP 2007, Leisure time and sports | 27599 | 15-97 | Political Participation | Cultural Group | 0.2630181* p= p<0.001 | 0.2991103* p= p<0.001 |
| University of Washington - Beyond High School | 831 | 16-18 | Voting in Presidential Election | Sports Frequency | -0.136453* p<0.01 | -0.1538481* p<0.01 |
| University of Washington - Beyond High School | 831 | 16-18 | Voting in Presidential Election | Debate Club | -0.0188179 | 0.001560463 |
| University of Washington - Beyond High School | 831 | 16-18 | Voting in Presidential Election | Drama Club | -0.06858288 | -0.1000801 |
| Youth Longitudinal 1991-1995/96, ZA3431 | 711 | 13-19 | Political Participation | Sports Participation Frequency | -0.06031622 | 0.06231472 |
| Youth Longitudinal 1991-1995/96, ZA3431 | 711 | 13-19 | Political Participation | Arts Group | 0.09330754 | -0.03878913 |
| Youth Longitudinal 1991-1995/96, ZA3431 | 711 | 13-19 | Political Participation | Religious Group | 0.0966342 | -0.03878913 |
| The Civic and Political Health of the Nation, 2002, ICPSR 37047 | 209-910 | 15-25 | Registered to vote | Composite Sports | -0.00149305 | -0.01906406 |
| The Civic and Political Health of the Nation, 2002, ICPSR 37047 | 209-910 | 15-25 | Registered to vote | HS Sports Participation | -0.01653627 | -0.0714244 |
| The Civic and Political Health of the Nation, 2002, ICPSR 37047 | 209-910 | 15-25 | Registered to vote | Non-HS Sports Participation | -0.1206084 | 0.2347004* p<0.05 |
| The Civic and Political Health of the Nation, 2002, ICPSR 37047 | 209-910 | 15-25 | Registered to vote | Student Council | -0.100294* p<0.05 | -0.08370654 |
| The Civic and Political Health of the Nation, 2002, ICPSR 37047 | 209-910 | 15-25 | Registered to vote | Debate | 0.03498052* p<0.05 | 0.02262029 |
| The Civic and Political Health of the Nation, 2002, ICPSR 37047 | 209-910 | 15-25 | Registered to vote | Cheer/Spirit | -0.07088449 | 0.0792928 |
| The Civic and Political Health of the Nation, 2002, ICPSR 37047 | 209-910 | 15-25 | Registered to vote | Drama | 0.009794701 | -0.02865627 |
| The Civic and Political Health of the Nation, 2002, ICPSR 37047 | 209-910 | 15-25 | Registered to vote | Non-HS Religious Youth Group | -0.01144291 | -0.08998425 |
| The Civic and Political Health of the Nation, 2002, ICPSR 37047 | 209-910 | 15-25 | Registered to vote | Non HS Political Group | -0.2865012* p<0.01 | -0.25*p<0.05 |
| Eurobarometer 88.4 | 27933 | 15-99 | Political Interest | Sports Club Membership | 0.08151927* p p<0.001 | 0.02811017* p<0.001 |
| Eurobarometer 97.3 | 26569 | 15-99 | Political Interest | Sports Participation | 0.1231124* p p<0.001 | 0.03774242* p<0.001 |
| * indicates correlations that are statistically significant at a 95% confidence level | | | | | | |

**Table A.2: ISSP Ordinal Models**

| **Table A.2: ISSP 2007, political participation regressed on sport participation by gender** | | | | | | | | | | | | |
| --- | --- | --- | --- | --- | --- | --- | --- | --- | --- | --- | --- | --- |
|  | **Model A.1** | | | **Model A.2** | | | **Model A.3 – Men only** | | | **Model A.4 – Women only** | | |
| *Predictors* | *Odds Ratios* | *std. Error* | *p* | *Odds Ratios* | *std. Error* | *p* | *Odds Ratios* | *std. Error* | *p* | *Odds Ratios* | *std. Error* | *p* |
| Sports participation | 1.38 | 0.01 | **<0.001** | 1.32 | 0.02 | **<0.001** | 1.35 | 0.02 | **<0.001** | 1.43 | 0.02 | **<0.001** |
| Gender (Female) | 0.75 | 0.02 | **<0.001** | 0.62 | 0.03 | **<0.001** |  |  |  |  |  |  |
| Social Class | 1.00 | 0.01 | 0.902 | 1.00 | 0.01 | 0.829 | 1.00 | 0.01 | 0.844 | 0.99 | 0.01 | 0.421 |
| Age | 1.00 | 0.00 | **0.021** | 1.00 | 0.00 | **0.012** | 1.00 | 0.00 | **<0.001** | 0.99 | 0.00 | **<0.001** |
| Sports participation x Gender |  |  |  | 1.09 | 0.02 | **<0.001** |  |  |  |  |  |  |
| Observations | 42790 | | | 42790 | | | 19390 | | | 23400 | | |
| R2 Nagelkerke | 0.044 | | | 0.045 | | | 0.035 | | | 0.047 | | |
| AIC | 39689.119 | | | 39671.622 | | | 20840.035 | | | 18776.640 | | |
